# Supplementary material
Source: PubMed Central journal article supplement (PMC6430640)
Supplement: NIHMS996822-supplement-Supp_FigS4.pdf [file NIHMS996822-supplement-Supp_FigS4.pdf]

immitis

posadasii

Introgressed genome (%)

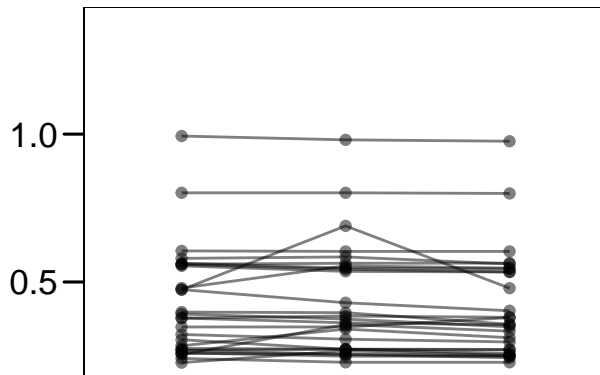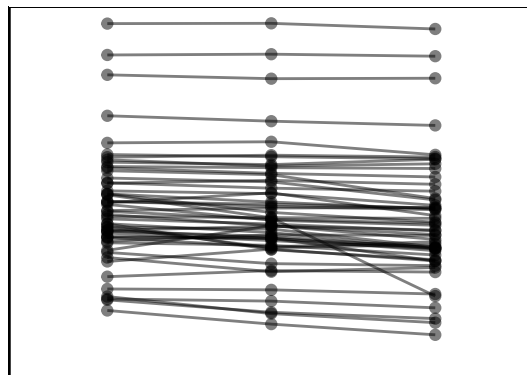

Average introgression tract length (bp)

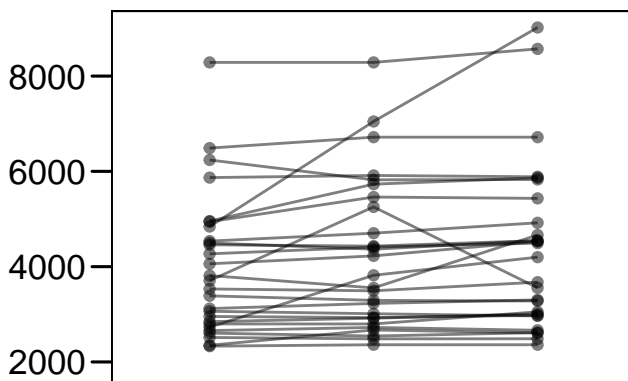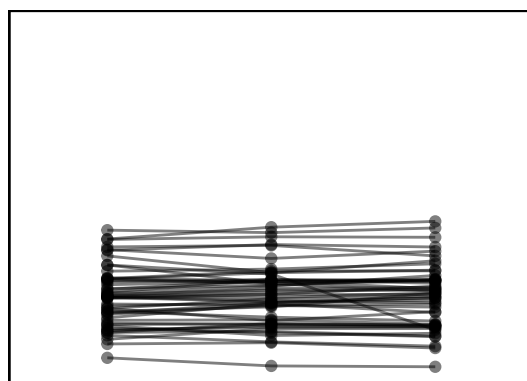

Number of introgression tracts

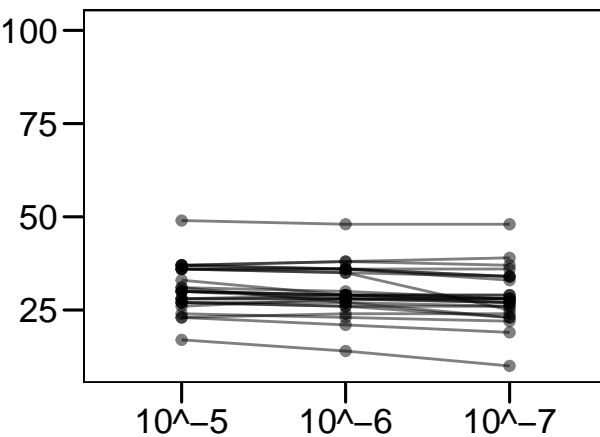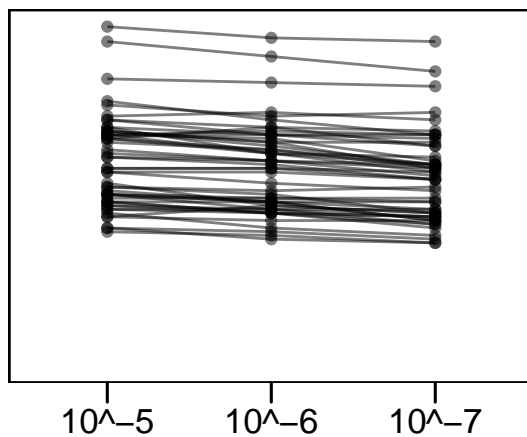

recomb. rate (M/bp)
