# Supplementary material
Source: PubMed Central journal article supplement (PMC6430640)

**A***C. immitis**C. posadasii*

Introgressed genome (%)

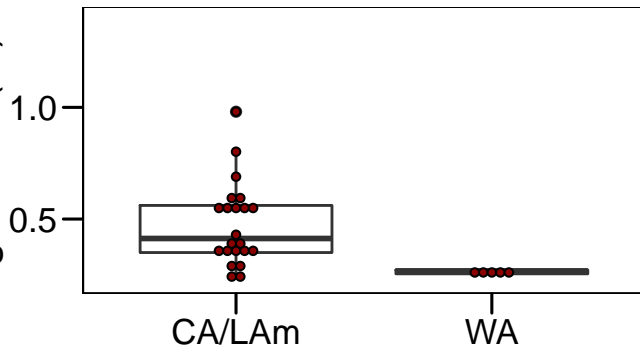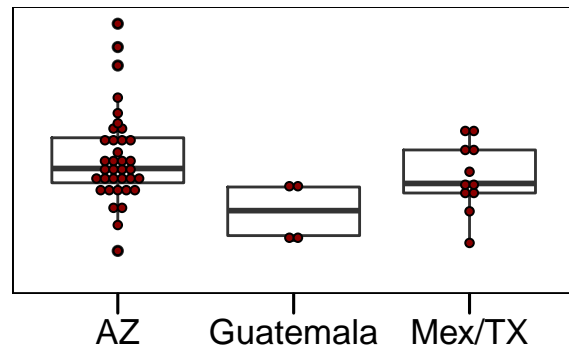

Average introgression tract length (bp)

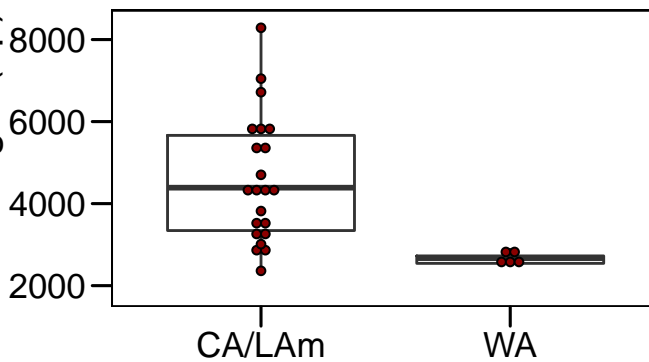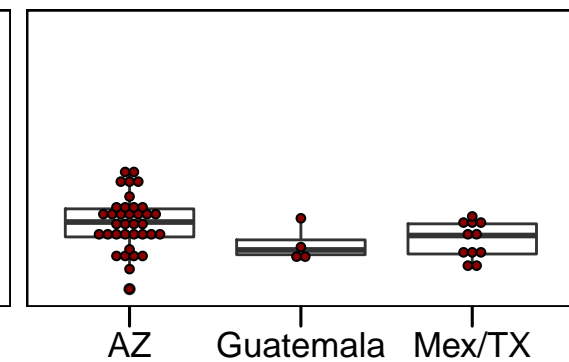

Number of introgression tracts

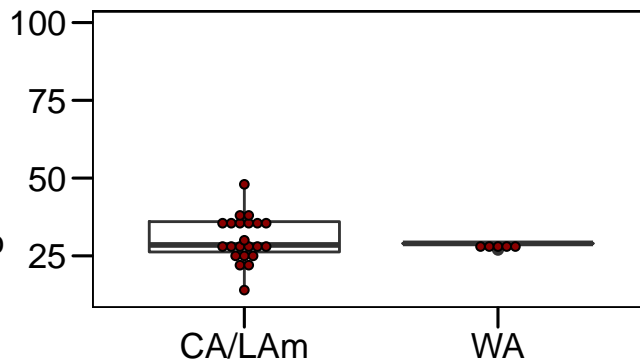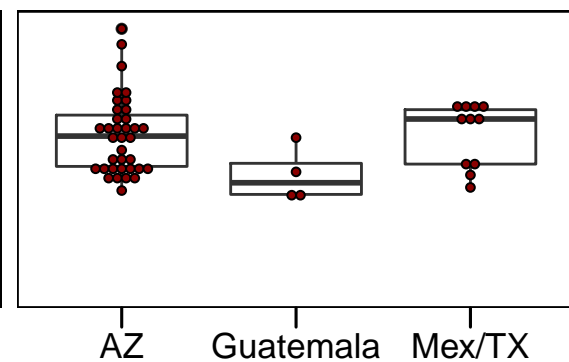

Supplement: NIHMS996822-supplement-Supp_FigS8.pdf [file NIHMS996822-supplement-Supp_FigS8.pdf]
