# Supplementary material
Source: PubMed Central journal article supplement (PMC6430640)

**A. *C. immitis***

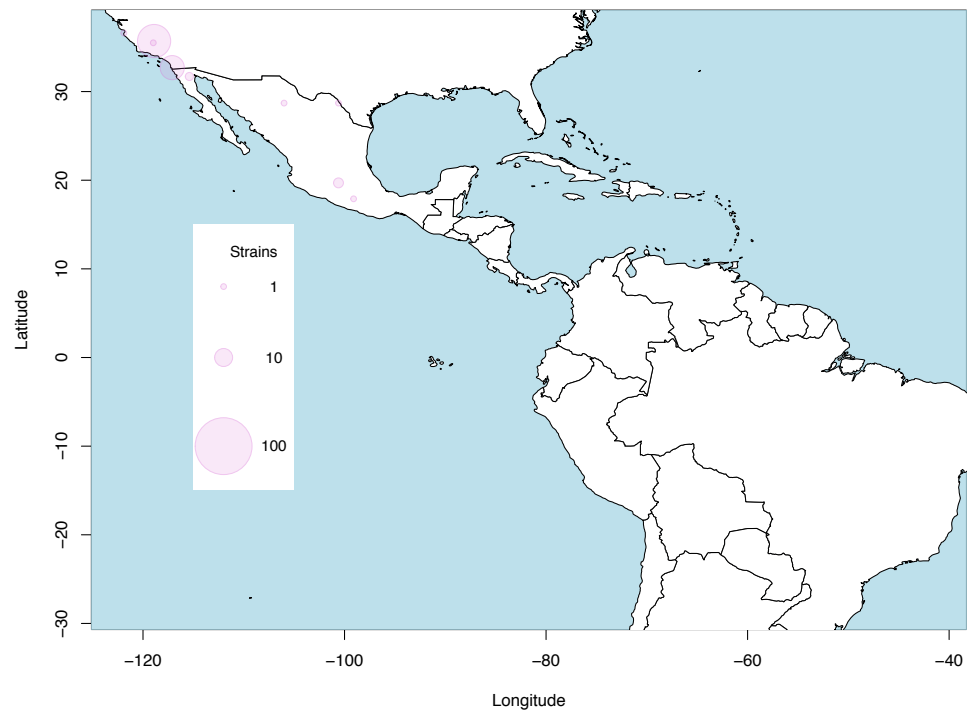

**B. *C. posadasii***

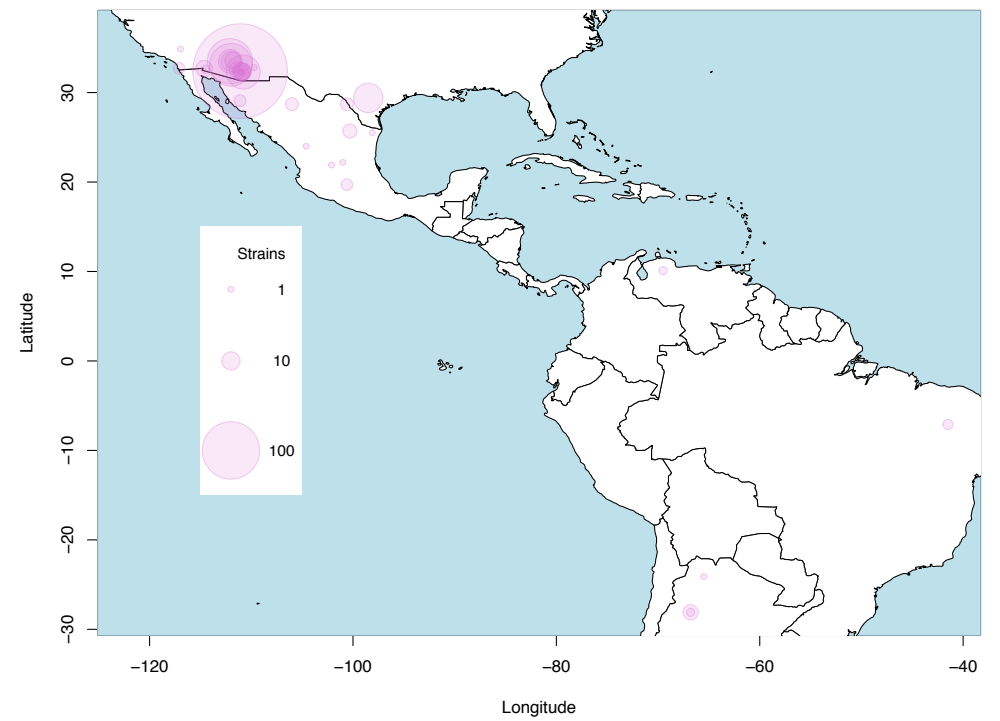

Supplement: NIHMS996822-supplement-Supp_FigS1.pdf [file NIHMS996822-supplement-Supp_FigS1.pdf]

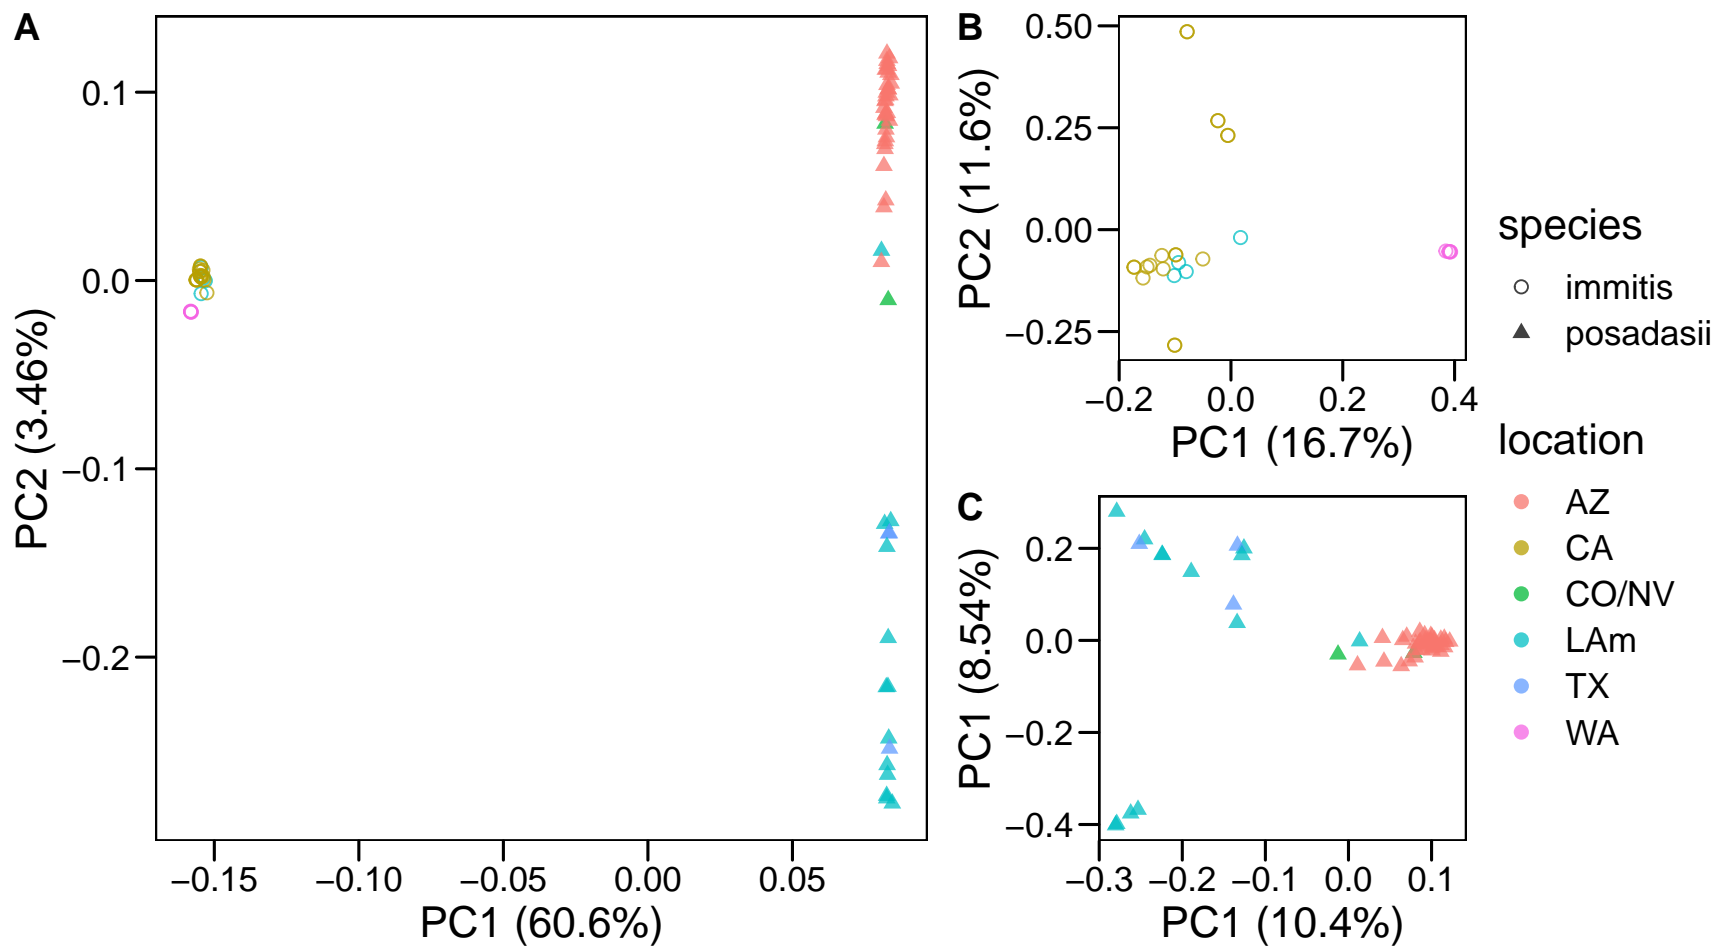

Supplement: NIHMS996822-supplement-Supp_FigS2.pdf [file NIHMS996822-supplement-Supp_FigS2.pdf]

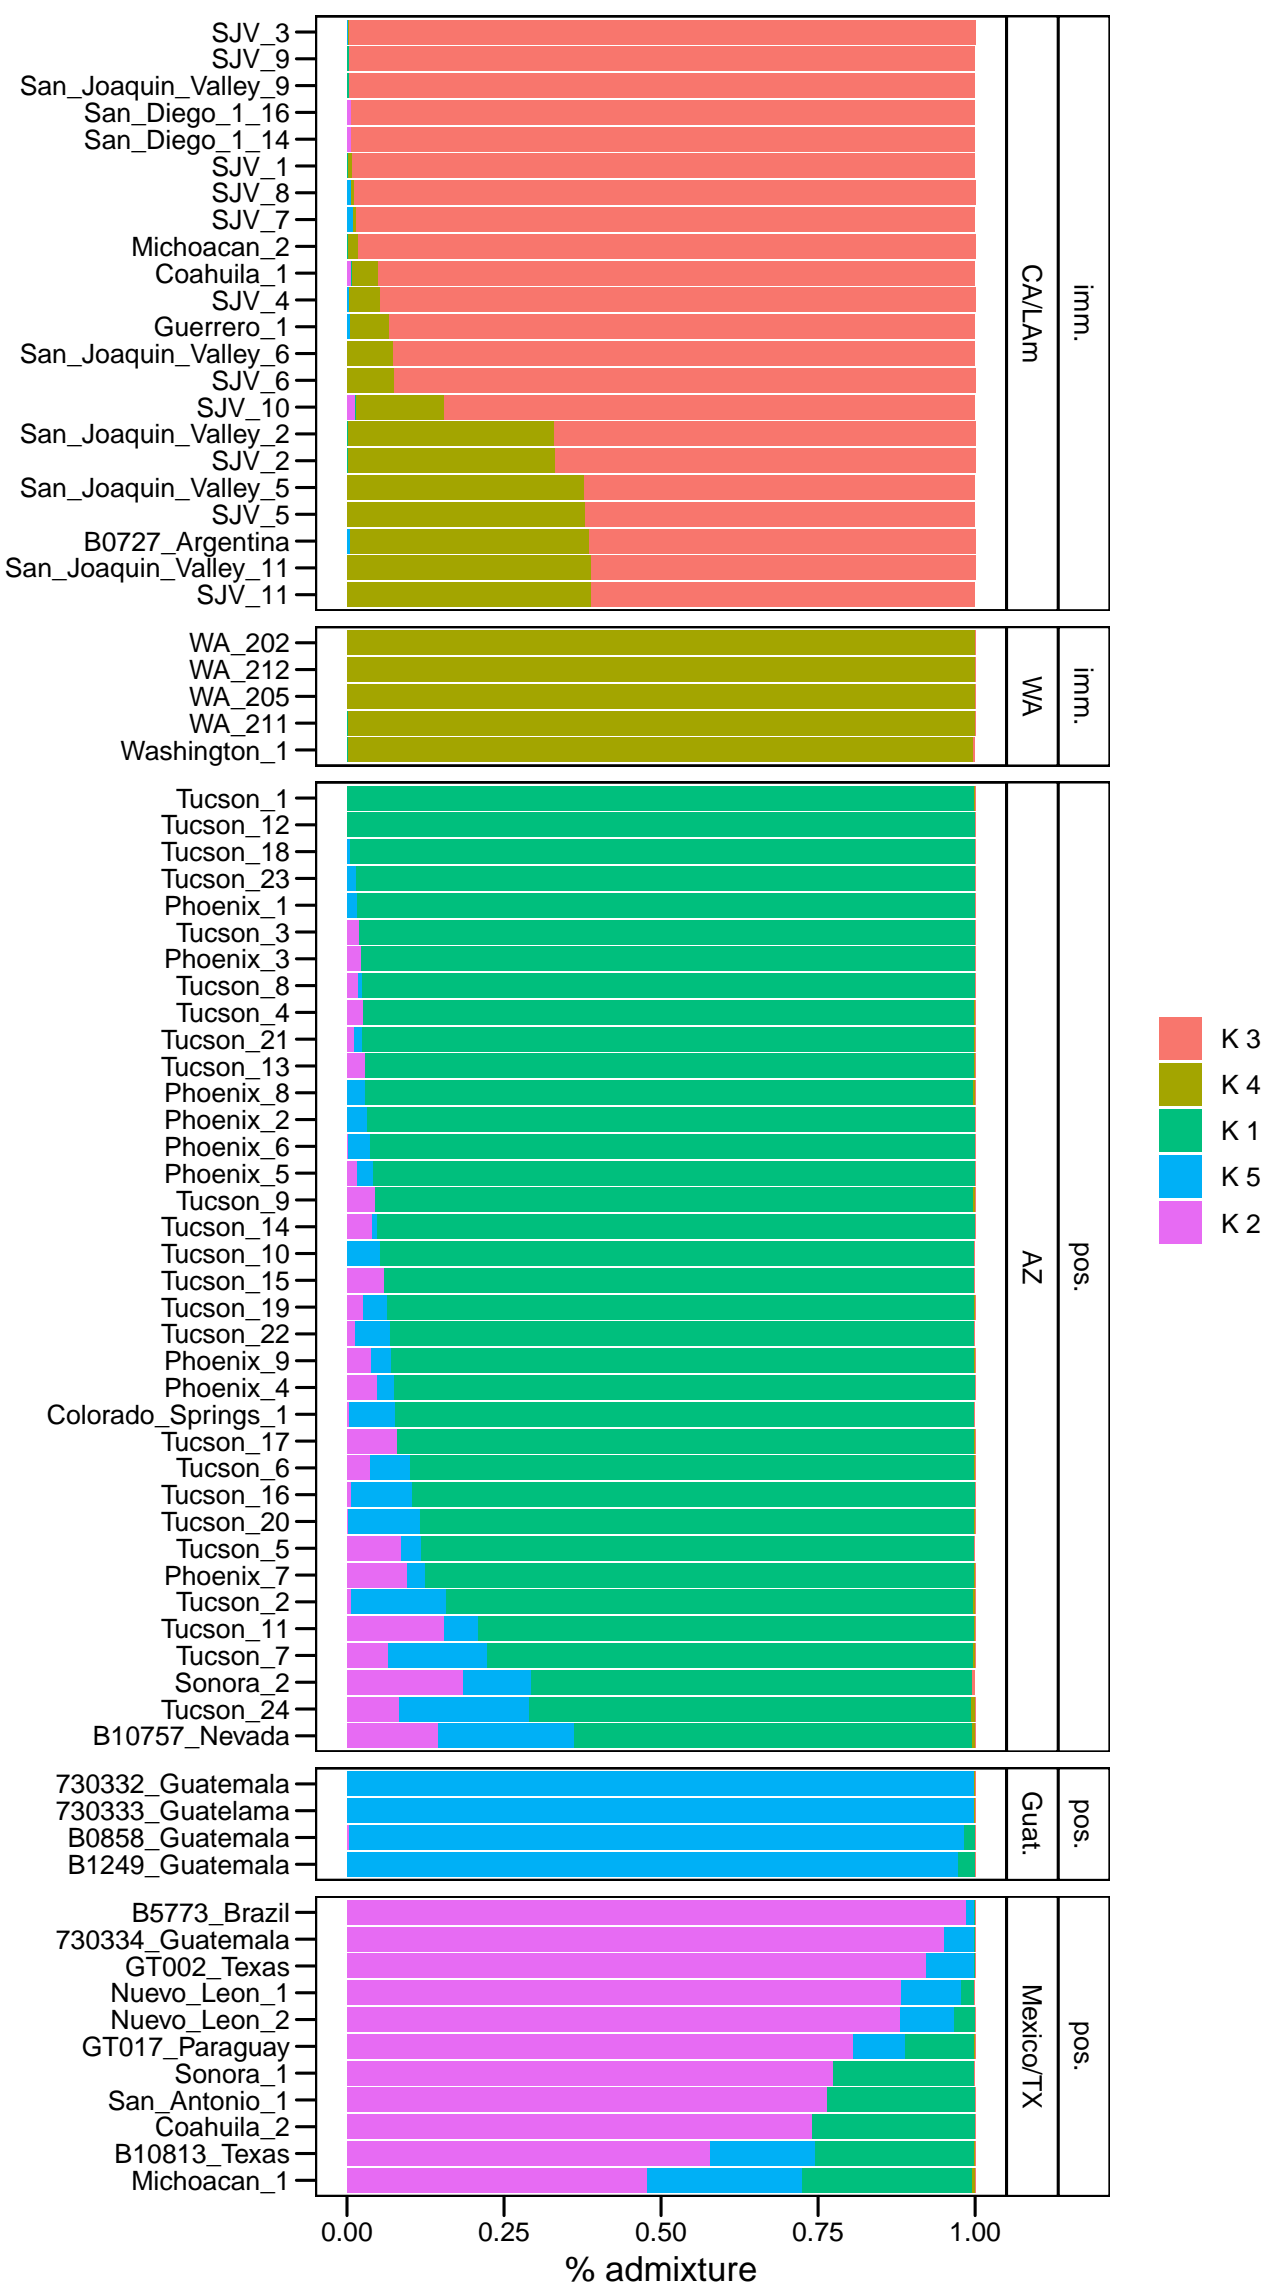

Supplement: NIHMS996822-supplement-Supp_FigS3.pdf [file NIHMS996822-supplement-Supp_FigS3.pdf]

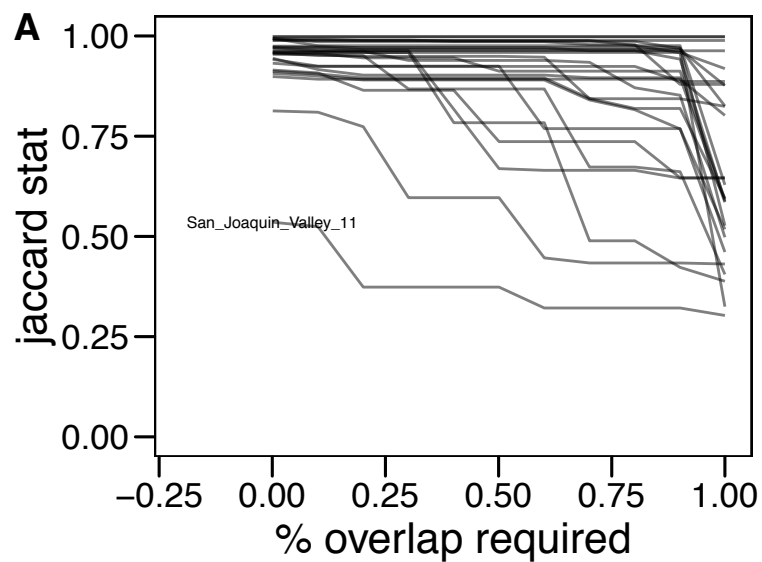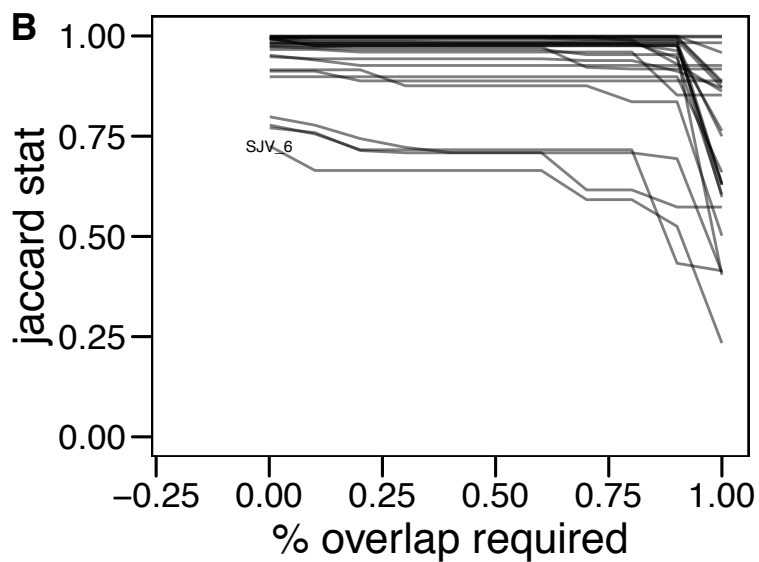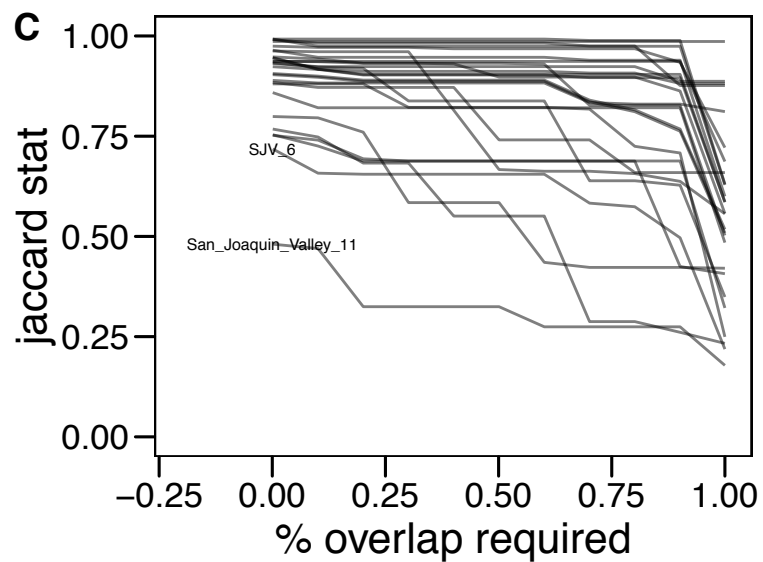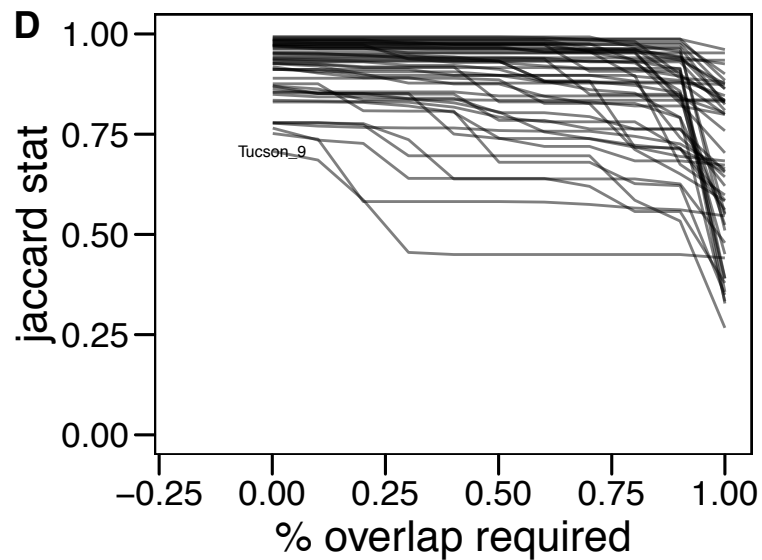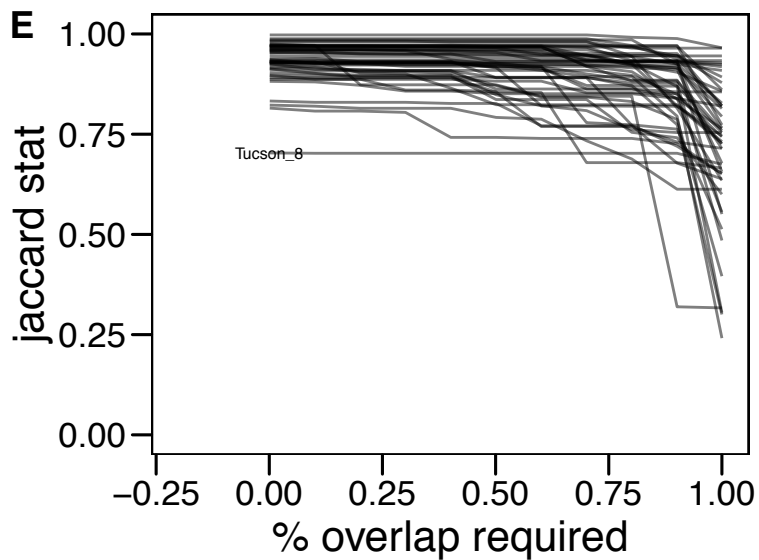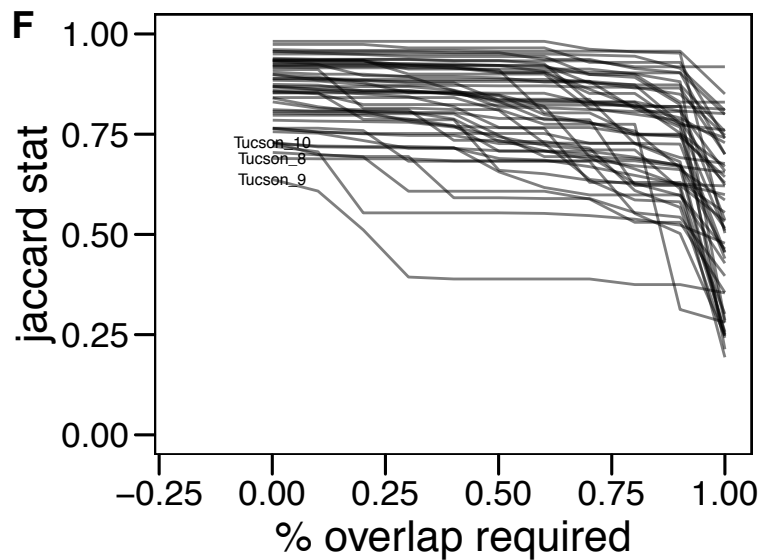

Supplement: NIHMS996822-supplement-Supp_FigS5.pdf [file NIHMS996822-supplement-Supp_FigS5.pdf]

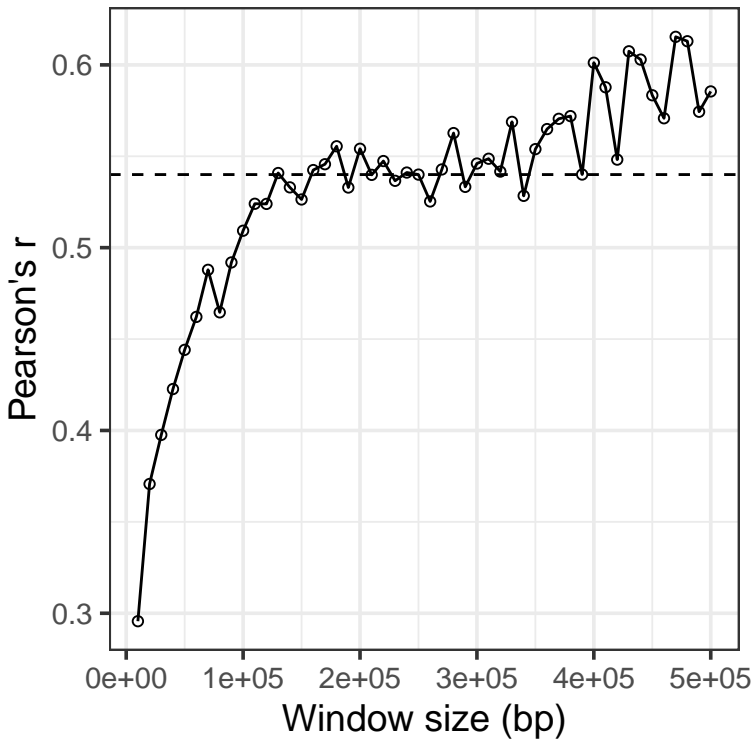

Supplement: NIHMS996822-supplement-Supp_FigS6.pdf [file NIHMS996822-supplement-Supp_FigS6.pdf]

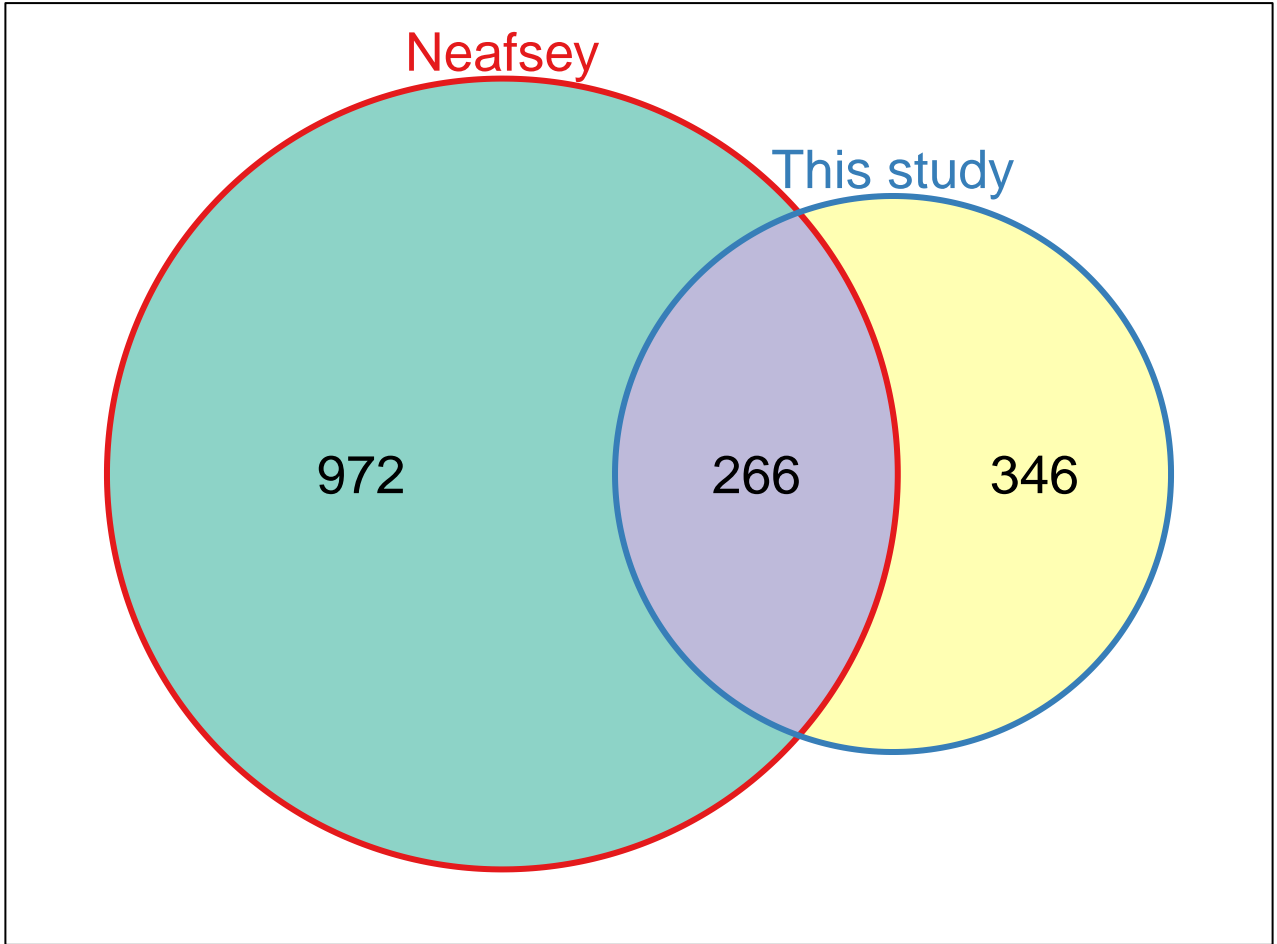

Neafsey

This study

972

266

346

Supplement: NIHMS996822-supplement-Supp_FigS7.pdf [file NIHMS996822-supplement-Supp_FigS7.pdf]
